# Supplementary material
Source: Springer Nature journal article supplement (https://www.springermedizin.de/resource/supplementary/12936_2013_3182_MOESM2_ESM.pdf/9545222)

Predicted Annual EIR Oct 01-Sept 02

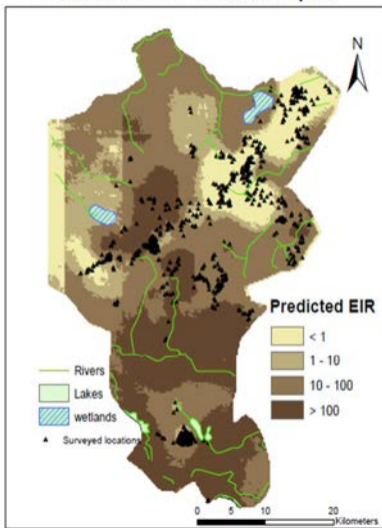

Predicted Annual EIR Oct 02-Sept 03

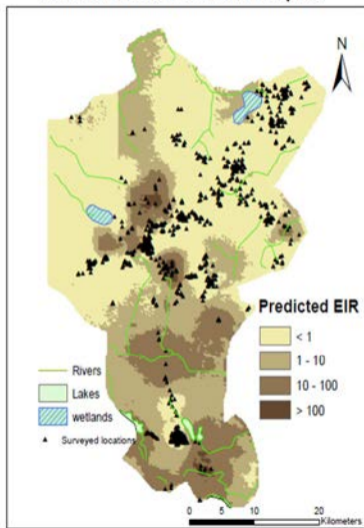

Predicted Annual EIR Oct 03-Sept 04

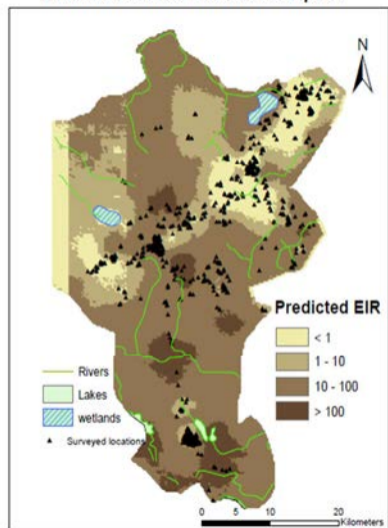

Supplement: MOESM2 [file 9545222]
